# Supplementary material
Source: PubMed Central journal article supplement (PMC7615985)
Supplement: EMS195969-supplement-Supplementary.pdf [file EMS195969-supplement-Supplementary.pdf]

Supplementary Document for

**Particle Uptake Driven Phagocytosis in Macrophages and Neutrophils Enhances Bacterial Clearance**

Preeti Sharma<sup>1</sup>, Anjali Vijaykumar<sup>1</sup>, Jayashree Vijaya Raghavan<sup>1</sup>, Supriya Rajendra Rananaware<sup>2</sup>, Alakesh Alakesh<sup>1</sup>, Janhavi Bodele<sup>1</sup>, Junaid Ur Rehman<sup>1</sup>, Shivani Shukla<sup>1</sup>, Virta Wagde<sup>1</sup>, Savitha Nadig<sup>3</sup>, Sveta Chakrabarti<sup>4</sup>, Sandhya S. Visweswariah<sup>4</sup>, Dipankar Nandi<sup>2</sup>, Balasubramanian Gopal<sup>3</sup>, Siddharth Jhunjhunwala<sup>1\*</sup>

1 – Centre for BioSystems Science and Engineering,

2 – Department of Biochemistry,

3 – Molecular Biophysics Unit

4 – Department of Molecular Reproduction, Development and Genetics

Indian Institute of Science, Bengaluru, India – 560012

\*Address correspondence to [siddharth@iisc.ac.in](mailto:siddharth@iisc.ac.in)

| <b>Item</b>           | <b>Page Number</b> |
|-----------------------|--------------------|
| Supplementary Figures | 2 – 12             |
| Supplementary Table   | 13                 |

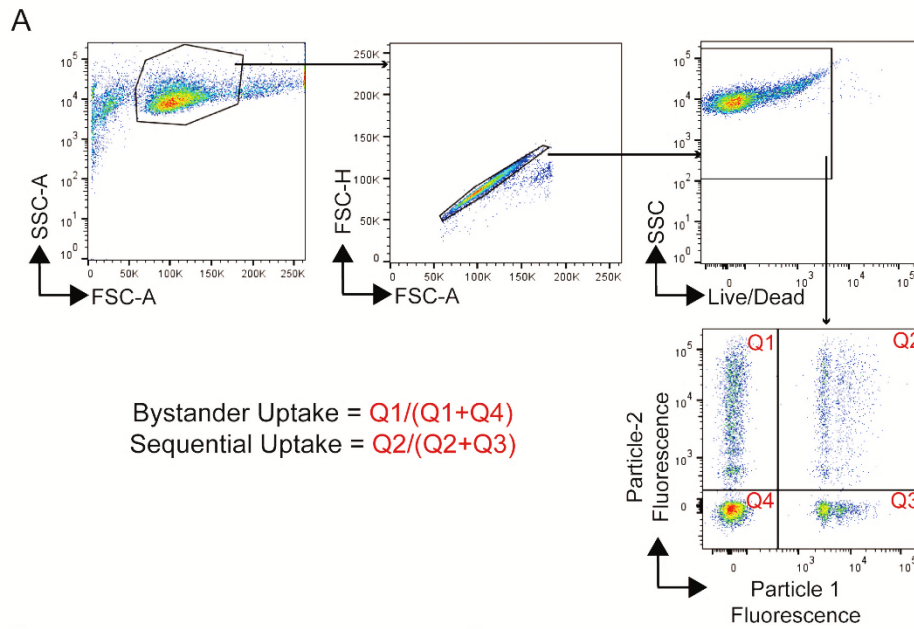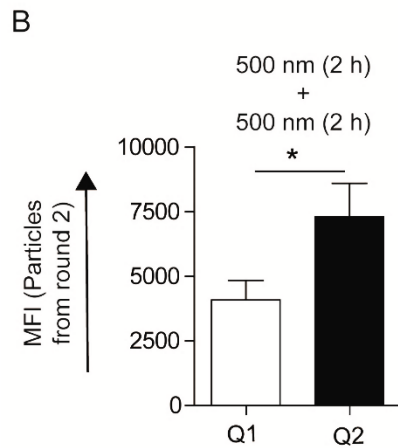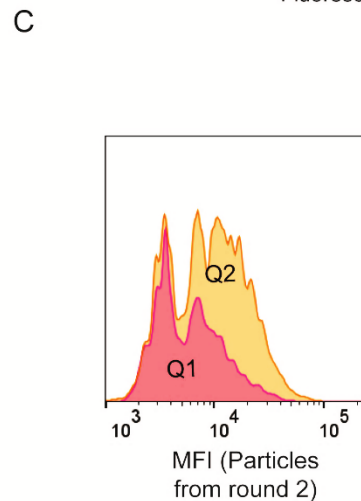

**Supplementary Figure 1: A** – Representative flow cytometry dot plots describing the gating strategy used to quantify bystander and sequential uptake by RAW macrophages (similar strategy was used for all other cell types too). **B** and **C** – Median fluorescence intensity (MFI) as a measure of the number of particles phagocytosed in the second round of phagocytosis by bystander cells (Q1) and cells with 500 nm-carboxylated polystyrene (PS) particles from round 1 (Q2). Data sets are representative of  $n \geq 3$ . \* =  $p < 0.05$  calculated using a paired Student's *t*-test.

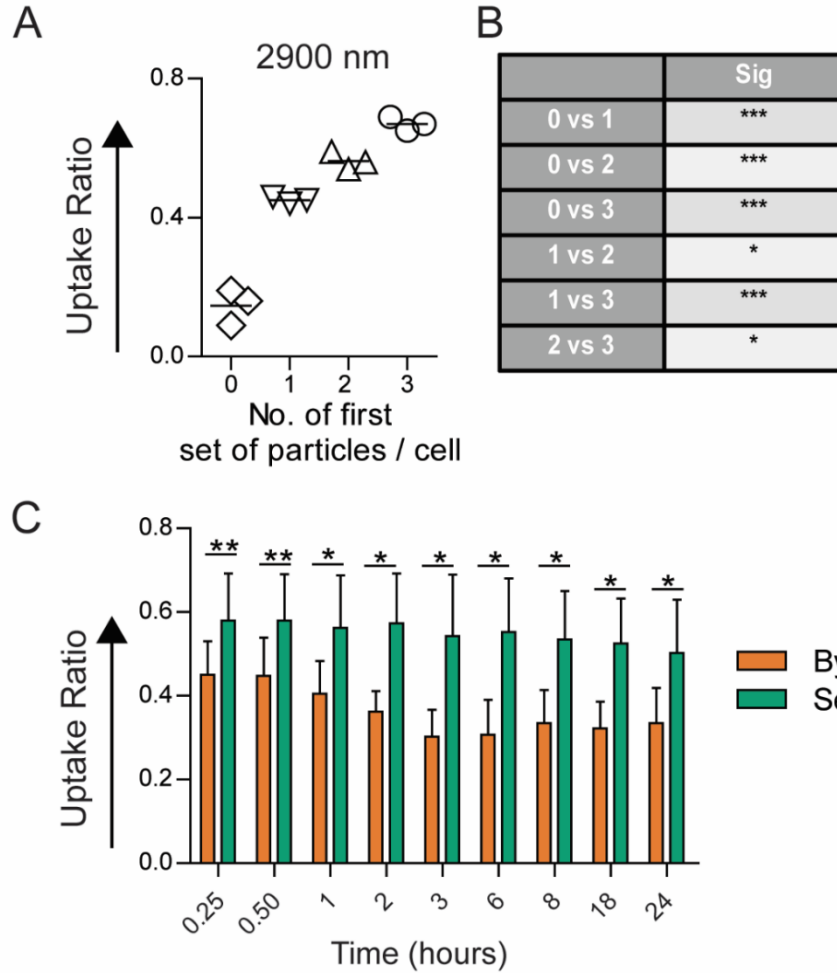

**Supplementary Figure 2: A** – Sequential uptake measured when cells take up different number of particles (2900 nm-carboxylated polystyrene particles added to cells at a cell to particle ratio of 1:2). **B** – Statistical comparison of data shown in **A** ( $n = 3$ ), performed using one-way ANOVA. **C** – Enhanced sequential phagocytosis observed at different incubation times with particles in first round of phagocytosis ( $t_1$  in figure 1A). Experiment was performed by addition of 1  $\mu\text{m}$ -carboxylated PS particles and 500 nm-carboxylated PS particles (ratio of 1:50) in a sequential manner. Data sets are representative of  $n = 3$ . \* =  $p < 0.05$  and \*\* =  $p < 0.01$  calculated using paired Student's  $t$ -test.

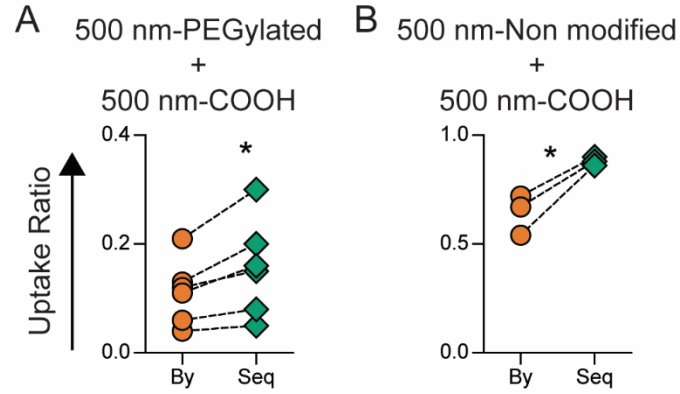

**Supplementary Figure 3:** Enhanced sequential phagocytosis observed with particles having different surface modifications. **A** – Polyethylene glycol (PEG) conjugated 500 nm polystyrene (PS) particles or **B** – 500 nm PS particles with no surface groups were added to RAW cells in first round (cell to particle ratio of 1:50 for 2 hours) followed by addition of 500 nm-carboxylated PS particles (cell to particle ratio of 1:50 for 2 hours) in the second round. Bystander (By) and sequential (Seq) uptake was quantified using flow cytometry. Data sets are representative of  $n \geq 3$ . \* =  $p < 0.05$  calculated using paired Student's *t*-test.

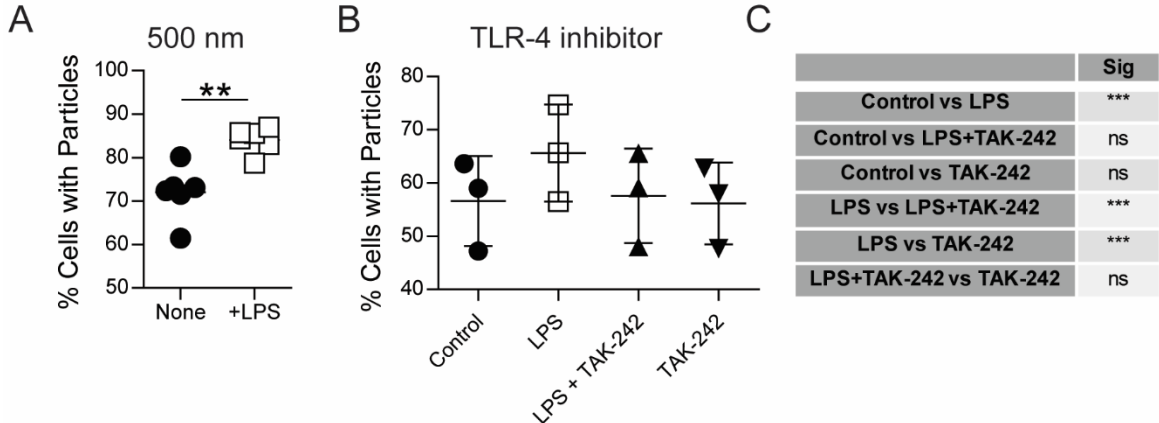

**Supplementary Figure 4: A** – LPS treatment results in increased uptake of particles by RAW macrophages. Cells were cultured with LPS (1 µg/ml) for 12-18 hours, and 500 nm-carboxylated polystyrene (PS) particles added subsequently at a cell to particle ratio of 1:50 for 2 hours. Percentage uptake was determined using a flow cytometer. Data sets are representative of  $n = 6$ . \*\* =  $p < 0.01$  calculated using Student's  $t$ -test. **B** – Uptake of 500 nm-carboxylated PS particles, added at a cell to particle ratio of 1:50, measured after treatment with LPS, LPS+TAK-242, or TAK-242 only. LPS treated cells show significantly higher uptake as measured by one-way ANOVA shown in **C**, and TAK-242 inhibits LPS mediated increase in uptake. Data sets are representative of  $n = 3$ . \*\* =  $p < 0.01$ , \*\*\* =  $p < 0.001$  and ns = non-significant.

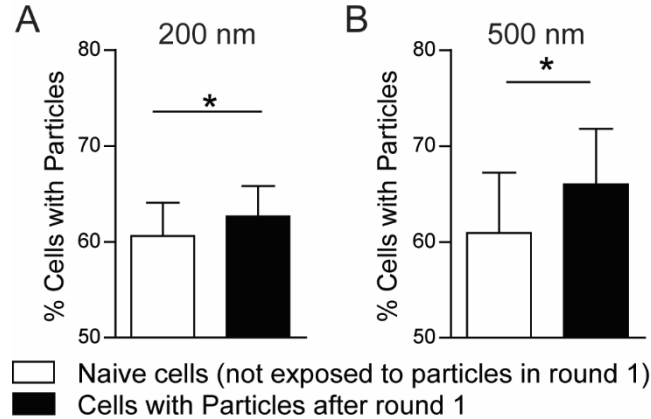

**Supplementary Figure 5: Uptake measure in cells that have particles (experimental group) compared to particle-naïve cells (control group).** Cells were cultured with 200 nm (cell to particle ratio of 1:4000 incubated for 2 hours) or 500 nm (cell to particle ratio of 1:200 incubated for 2 hours) carboxylated PS particles (experimental groups) such that over 95% of cells had particles. In these cells, the ability to take up additional particles was quantified by adding particles made of a different fluorophore (1  $\mu$ m-carboxylated PS at a cell to particle ratio of 1:10) and compared to naïve cells (not exposed to particles in the first round), which were exposed to the particles in the “second round”. Data are based on  $n \geq 3$  independent experiments (each performed in duplicate). \* indicates  $p < 0.05$  measured using paired Student’s  $t$ -test.

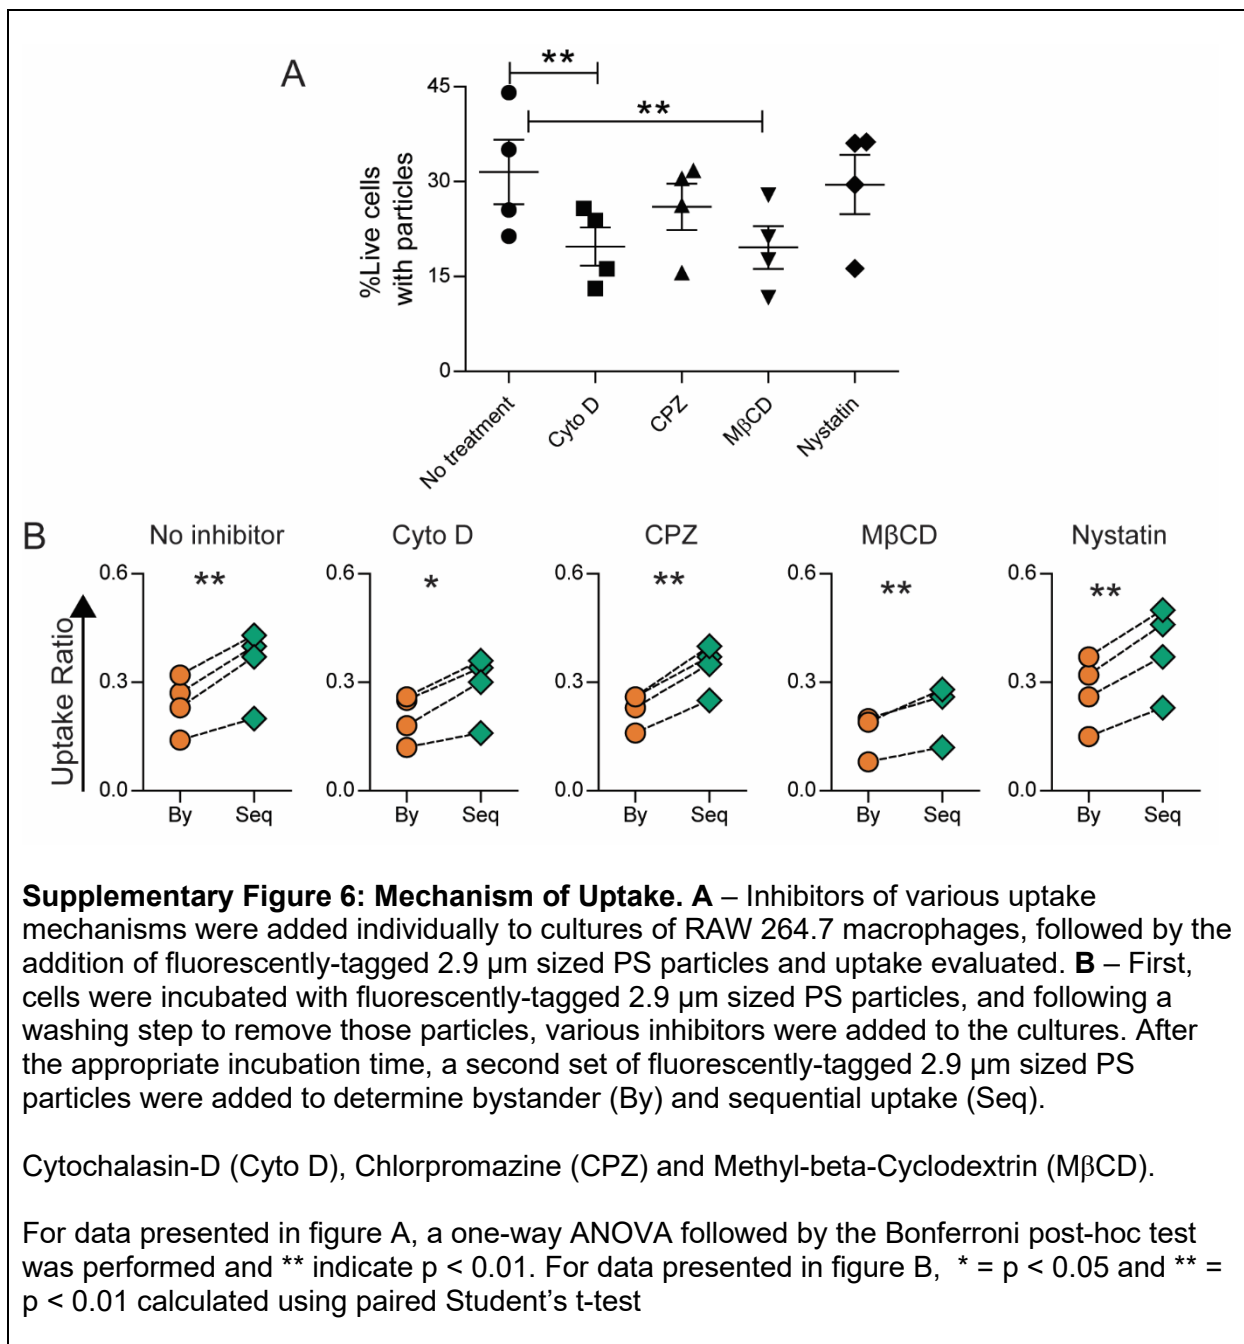

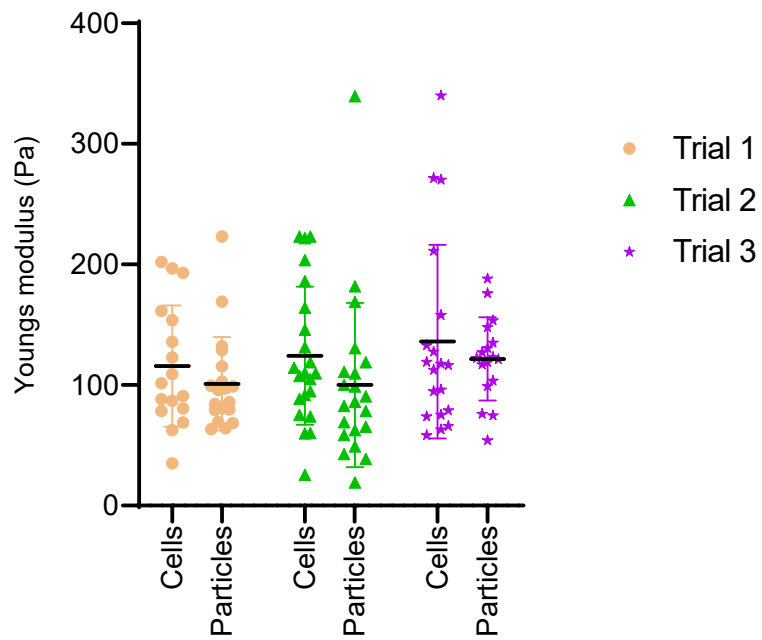

**Supplementary Figure 7:** Data presented in figure 5B represented as independent trials



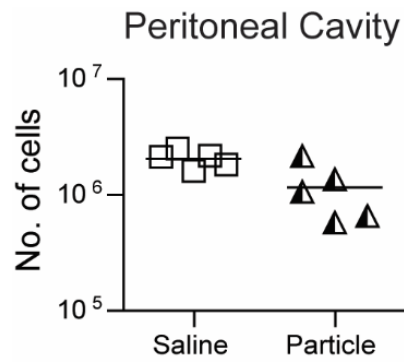

**Supplementary Figure 8:** Total cell counts in peritoneal cavity of mice 2 hours following intraperitoneal injection of  $10^{10}$  500 nm-carboxylated polystyrene particles compared to saline injected mice. Each data point corresponds to one mouse. Mann-Whitney test was performed for statistical comparison.

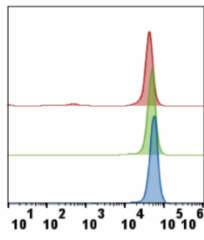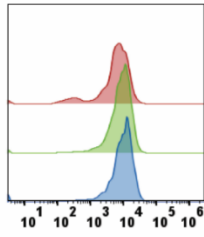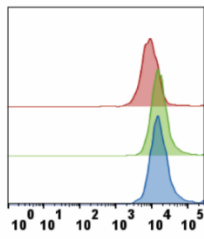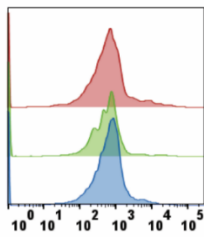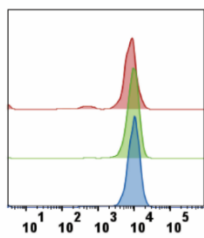

Fluorescence Intensity

CD11b

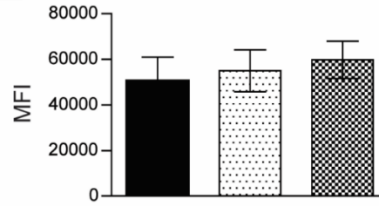

CD38

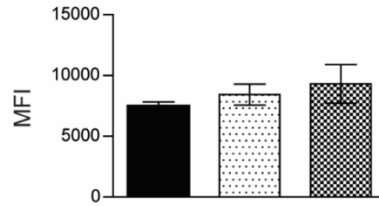

CD54

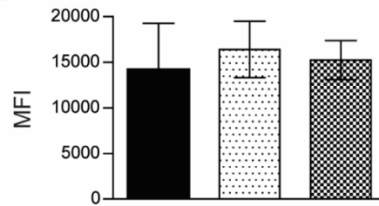

CD62L

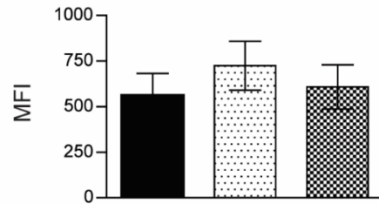

CD86

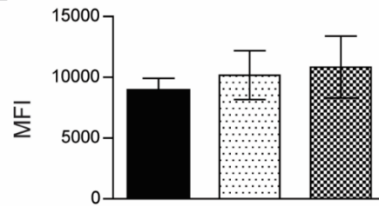

■ Naive Cells  
■ 500 nm (1:100)  
■ 500 nm (1:1000)

**Supplementary Figure 9:**

Expression of surface proteins CD11b, CD38, CD54, CD62L and CD86 on mouse peritoneal macrophages incubated with 500 nm-carboxylated polystyrene particles for 2 hours and compared to naïve cells that were not exposed to particles. Data are based on  $n = 3$  independent experiments (each performed in duplicate). One-way ANOVA showed no statistical differences between the groups

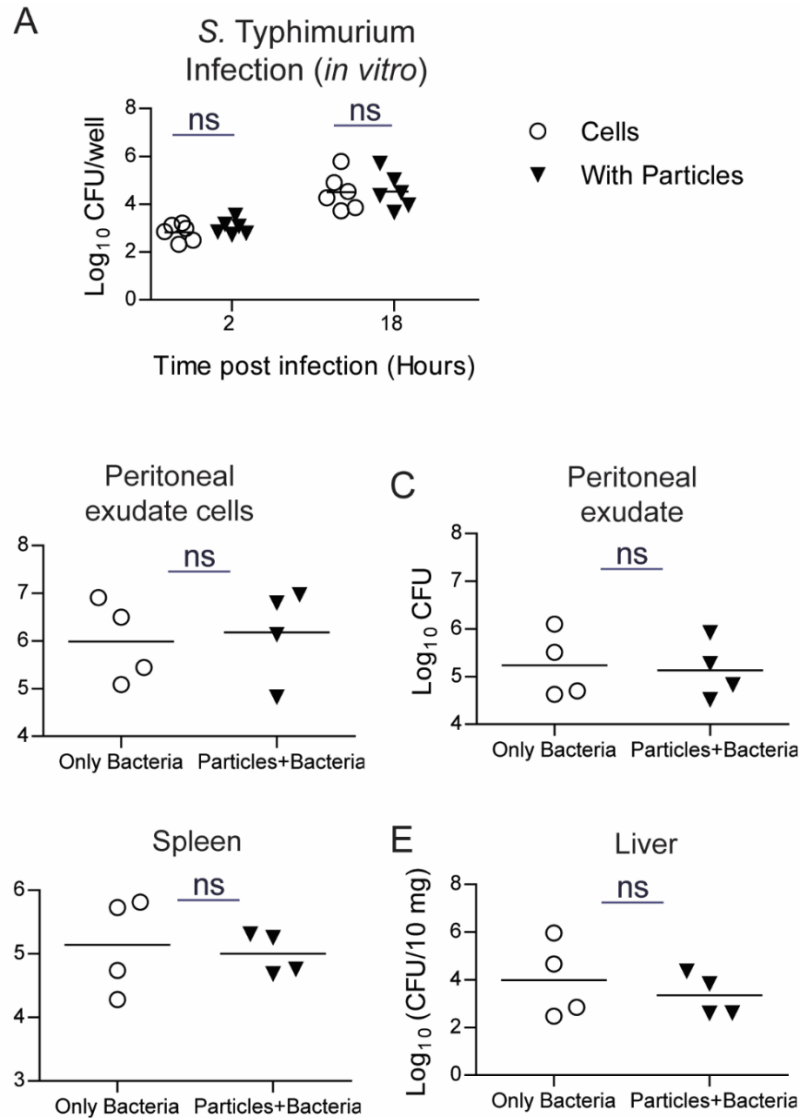

**Supplementary Figure 10: Particles and *Salmonella Typhimurium*.** **A** – Uptake and intracellular replication of *S. Typhimurium* (MOI 5-50) inside RAW macrophages following culture of RAW cells with 500 nm-carboxylated polystyrene particles (or control cells without particles). Intracellular bacterial numbers were determined using gentamicin protection assay at various times post-infection. **B-E** – Kinetics of bacterial clearance determined in C57BL/6 mice following intraperitoneal injection of 10<sup>9</sup> 500nm-carboxylated PS particles or saline, and subsequent injection of 400 – 1000 *S. Typhimurium*. Enumeration of intracellular bacteria measured as colony forming units (CFU) obtained by plating cell or organ lysate at specified times post infection. Data sets are representative of *n* = 6 independent experiments for *in vitro* studies and *n* = 4 mice for *in vivo* studies. ns indicates non-significant calculated using Student's *t*-test.

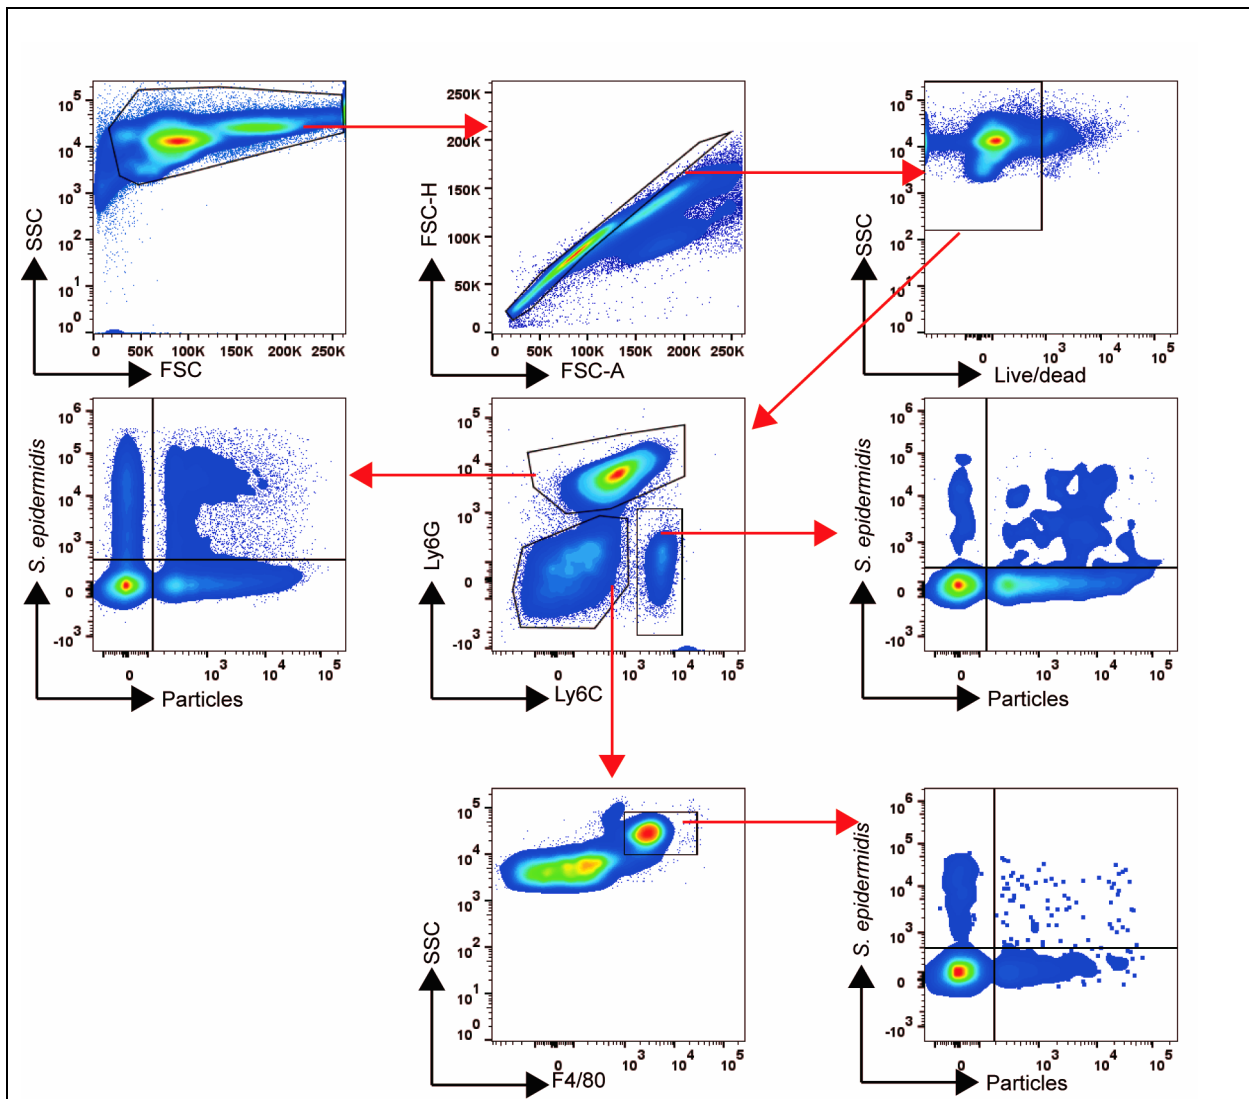

**Supplementary figure 11: Gating strategy used to determine bystander and sequential uptake of *S. epidermidis* *in vivo*.** Representative flow cytometry dot plots describing the gating scheme used for *in vivo* bacterial killing assays with *S. epidermidis*. Ly6G is a marker for neutrophils, Ly6C is a marker for monocytes, and F4/80 expressing cells that do not express Ly6G and Ly6C are macrophages. SSC indicates side scatter and FSC indicates forward scatter.

**Supplementary Table 1: List of Primers and primer sequence used**

| <b>Gene</b>                           | <b>Forward Primer</b>           | <b>Reverse Primer</b>         |
|---------------------------------------|---------------------------------|-------------------------------|
| <b><i>Gapdh</i></b>                   | 5'-AGGTCGGTGTGAACGGATTTG-3'     | 5'-GGGGTCGTTGATGGCAACA-3'     |
| <b><i>IL-1<math>\beta</math></i></b>  | 5'-CAACCAACAAGTGATATTCTCCATG-3' | 5'-GATCCACACTCTCCAGCTGCA-3'   |
| <b><i>IL-6</i></b>                    | 5'-TACCACTTCACAAGTCGGAGGC-3'    | 5'-CTGCAAGTGCATCATCGTTGTTC-3' |
| <b><i>Tnf-<math>\alpha</math></i></b> | 5'-GGTGCCTATGTCTCAGCCTCTT-3'    | 5'-GCCATAGAACTGATGAGAGGGAG-3' |
